# Supplementary material for: Environmental and Circadian Regulation Combine to Shape the Rhythmic Selenoproteome
Source: MDPI journal article supplement (doi:10.3390/cells11030340), 2022-01-20
Supplement: s1 [file s1]

Blue labelling of x axis segments indicates significant rhythmicity

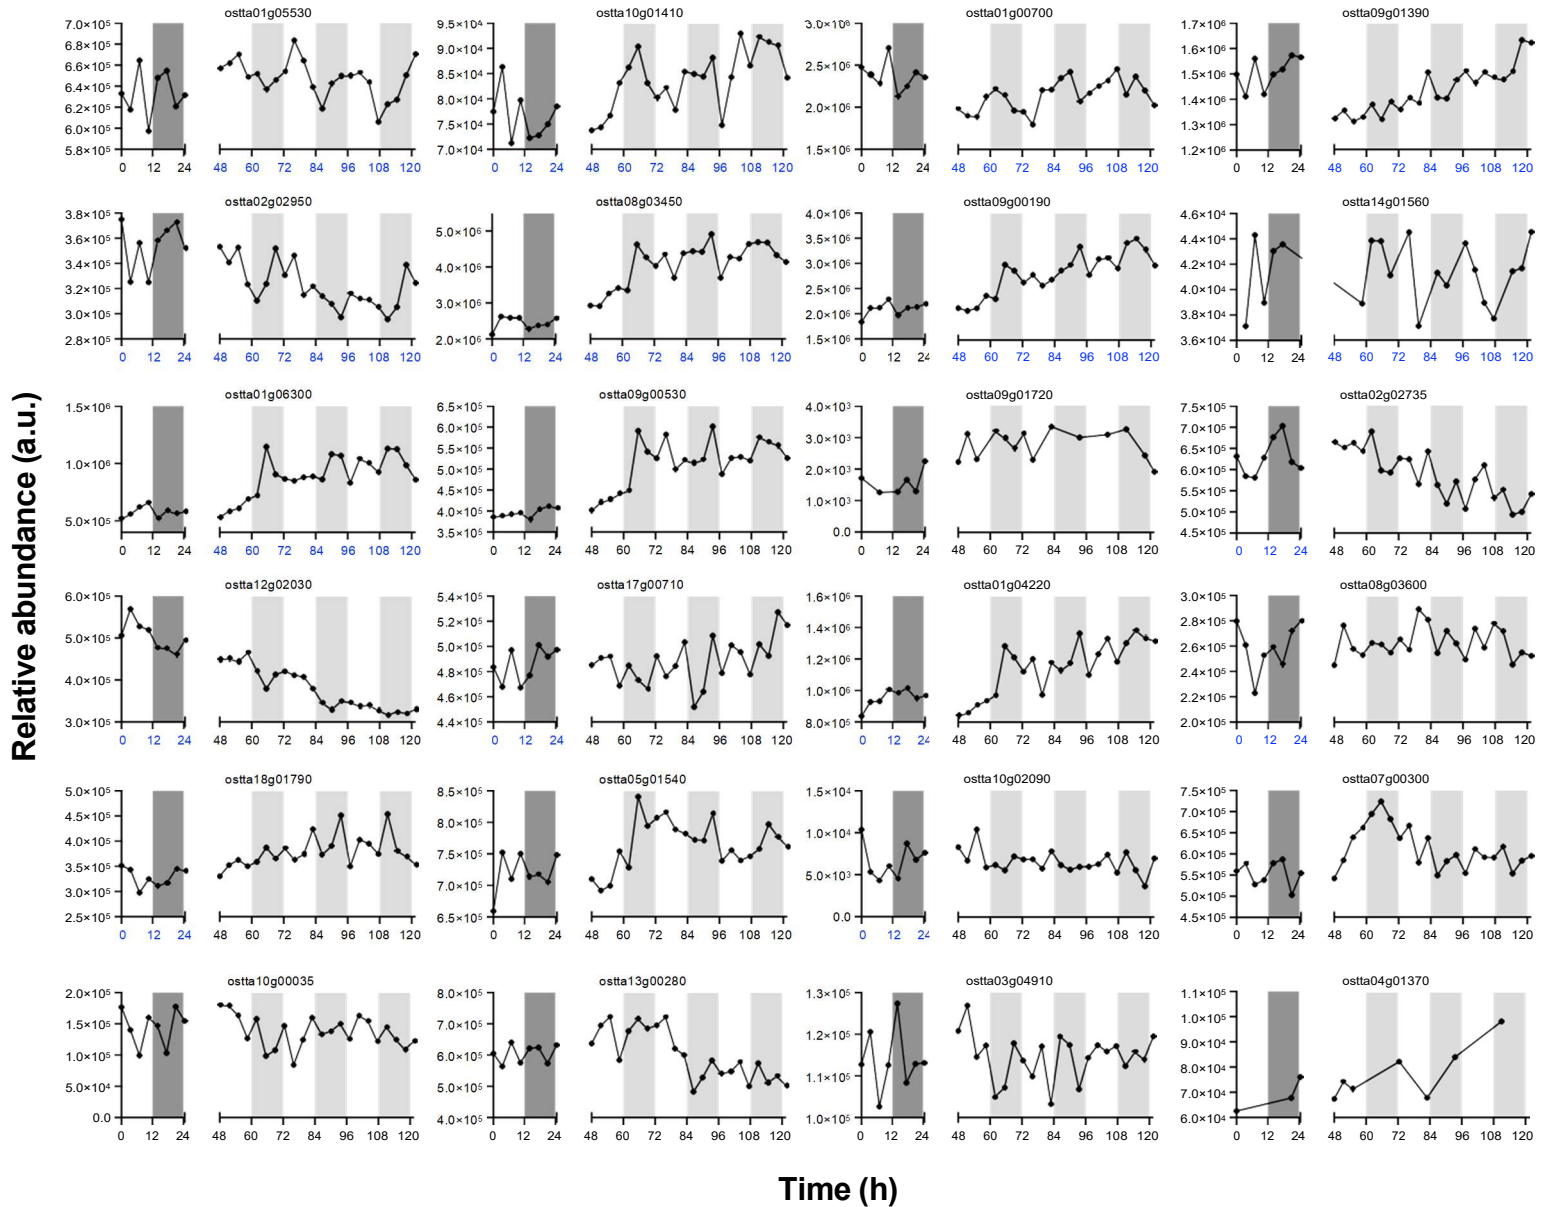

**Supplemental Figure S1: Abundance profiles of all selenoproteins under LD and LL conditions.**

Abundance profiles of all 24 selenoproteins over a single cycle of light-dark (0-24h) and three cycles of constant light (48-120h). Proteins are ordered by p-value for rhythmicity under LL. If a protein is significantly rhythmic in LL, this is reflected by blue numbering of the time axis for LL timepoints. If a protein is significantly rhythmic under LD, this is reflected by blue numbering of the LD time axis. Three proteins are rhythmic under both conditions.

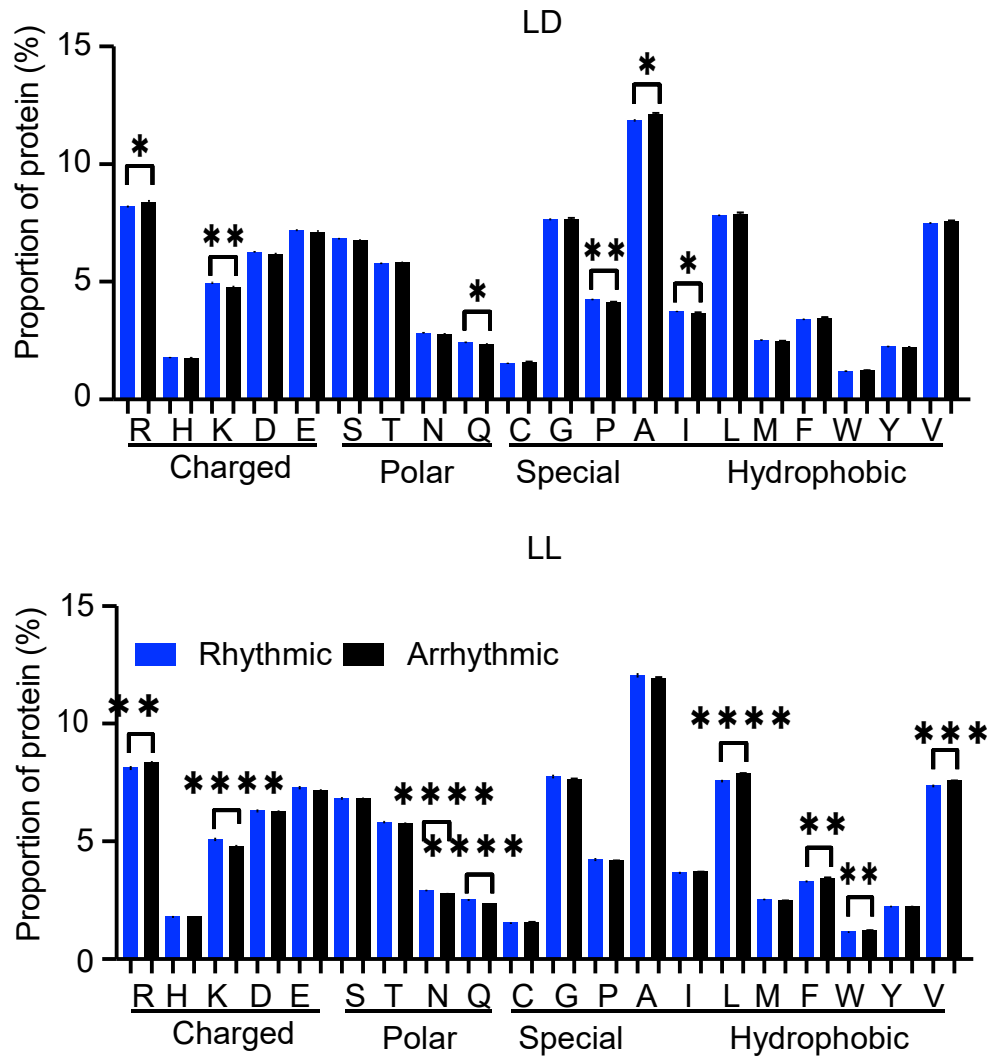

### Supplemental Figure S2: Amino acid usage among rhythmic versus arrhythmic proteins

Amino acid usage for the 20 directly encoded proteinogenic amino acids, expressed as the average proportion of a protein amongst rhythmic versus arrhythmic proteins in LD (top) or LL (bottom). Statistics are unpaired nonparametric tests (Mann-Whitney); \*\*\*\* p value <0.0001; \*\*\* p value <0.001; \*\* p value <0.01; \* p value <0.05.
